# Supplementary material for: Differential metabolic activity and discovery of therapeutic targets using summarized metabolic pathway models
Source: PubMed Central journal article supplement (PMC6397295; doi:10.1038/s41540-019-0087-2), 2019-03-01

| Module   | Main Category                        | Sub category of main category (if exist) | Description/Name                                                                                      | KGML     | Paths                               | module_link                                       | start_molecule                                                       | end_molecule                                            |
|----------|--------------------------------------|------------------------------------------|-------------------------------------------------------------------------------------------------------|----------|-------------------------------------|---------------------------------------------------|----------------------------------------------------------------------|---------------------------------------------------------|
| M00001   | Carbohydrate and lipid metabolism    | Central carbohydrate metabolism          | Glycolysis (Embden-Meyerhof pathway), glucose => pyruvate                                             | hsa00010 | hsa01200;hsa00010                   | <a href="http://www.genome">http://www.genome</a> | C00267: alpha-D-Glucose                                              | C00022: Pyruvate                                        |
| M00002   | Carbohydrate and lipid metabolism    | Central carbohydrate metabolism          | Glycolysis, core module involving three-carbon compounds                                              | hsa00010 | hsa01200;hsa01230;hsa00010          | <a href="http://www.genome">http://www.genome</a> | C00111: Glycerone phosphate                                          | C00022: Pyruvate                                        |
| M00003   | Carbohydrate and lipid metabolism    | Central carbohydrate metabolism          | Gluconeogenesis, oxaloacetate => fructose-6P                                                          | hsa00010 | hsa00010;hsa00020                   | <a href="http://www.genome">http://www.genome</a> | C00036: Oxaloacetate                                                 | C05345: beta-D-Fructose 6-phosphate                     |
| M00004   | Carbohydrate and lipid metabolism    | Central carbohydrate metabolism          | Pentose phosphate pathway (Pentose phosphate cycle)                                                   | hsa00030 | hsa01200;hsa00030                   | <a href="http://www.genome">http://www.genome</a> | C01172: beta-D-Glucose 6-phosphate                                   | C01172: beta-D-Glucose 6-phosphate                      |
| M00006   | Carbohydrate and lipid metabolism    | Central carbohydrate metabolism          | Pentose phosphate pathway, oxidative phase, glucose 6P => ribulose 5P                                 | hsa00030 | hsa01200;hsa00030                   | <a href="http://www.genome">http://www.genome</a> | C01172: beta-D-Glucose 6-phosphate                                   | C00199: D-Ribulose 5-phosphate                          |
| M00007   | Carbohydrate and lipid metabolism    | Central carbohydrate metabolism          | Pentose phosphate pathway, non-oxidative phase, fructose 6P => ribose                                 | hsa00030 | hsa01200;hsa01230;hsa00030          | <a href="http://www.genome">http://www.genome</a> | C05345+C00118: beta-D-Fructose 6-phosphate + D-Glyceraldehyde 3-phos | C00117: D-Ribose 5-phosphate                            |
| M00009   | Carbohydrate and lipid metabolism    | Central carbohydrate metabolism          | Citrate cycle (TCA cycle, Krebs cycle)                                                                | hsa00020 | hsa01200;hsa00020                   | <a href="http://www.genome">http://www.genome</a> | C00024+C00036: Acetyl-CoA + Oxaloacetate                             | C00036: Oxaloacetate                                    |
| M00010   | Carbohydrate and lipid metabolism    | Central carbohydrate metabolism          | Citrate cycle, first carbon oxidation, oxaloacetate => 2-oxoglutarate                                 | hsa00020 | hsa01200;hsa01210;hsa01230;hsa00020 | <a href="http://www.genome">http://www.genome</a> | C00036+C00024: Oxaloacetate + Acetyl-CoA                             | C00026: 2-Oxoglutarate                                  |
| M00011   | Carbohydrate and lipid metabolism    | Central carbohydrate metabolism          | Citrate cycle, second carbon oxidation, 2-oxoglutarate => oxaloacetate                                | hsa00020 | hsa01200;hsa00020                   | <a href="http://www.genome">http://www.genome</a> | C00026+C15972: 2-Oxoglutarate + Enzyme N6-(lipoyl)lysine             | C00036: Oxaloacetate                                    |
| M00013   | Carbohydrate and lipid metabolism    | Other carbohydrate metabolism            | Malonate semialdehyde pathway, propanoyl-CoA => acetyl-CoA                                            | hsa00640 | hsa01200;hsa00640                   | <a href="http://www.genome">http://www.genome</a> | C00100: Propanoyl-CoA                                                | C00024: Acetyl-CoA                                      |
| M00014   | Carbohydrate and lipid metabolism    | Other carbohydrate metabolism            | Glucuronate pathway (uronate pathway)                                                                 | hsa00040 | hsa00040                            | <a href="http://www.genome">http://www.genome</a> | C00029: UDP-glucose                                                  | C00231: D-Xylulose 5-phosphate                          |
| M00015   | Nucleotide and amino acid metabolism | Arginine and proline metabolism          | Proline biosynthesis, glutamate => proline                                                            | hsa00330 | hsa01230;hsa00330                   | <a href="http://www.genome">http://www.genome</a> | C00025: L-Glutamate                                                  | C00148: L-Proline                                       |
| M00020   | Nucleotide and amino acid metabolism | Serine and threonine metabolism          | Serine biosynthesis, glycerate-3P => serine                                                           | hsa00260 | hsa01200;hsa01230;hsa00260          | <a href="http://www.genome">http://www.genome</a> | C00197: 3-Phospho-D-glycerate                                        | C00065: L-Serine                                        |
| M00027   | Nucleotide and amino acid metabolism | Other amino acid metabolism              | GABA (gamma-Aminobutyrate) shunt                                                                      | hsa00250 | hsa00250                            | <a href="http://www.genome">http://www.genome</a> | C00025: L-Glutamate                                                  | C00042: Succinate                                       |
| M00029_1 | Nucleotide and amino acid metabolism | Arginine and proline metabolism          | Urea cycle                                                                                            | hsa00220 | hsa01230;hsa00220                   | <a href="http://www.genome">http://www.genome</a> | C00014+C00049: Ammonia + L-Aspartate                                 | C00122: Fumarate                                        |
| M00029_2 | Nucleotide and amino acid metabolism | Arginine and proline metabolism          | Urea cycle                                                                                            | hsa00220 | hsa01230;hsa00220                   | <a href="http://www.genome">http://www.genome</a> | C00014+C00049: Ammonia + L-Aspartate                                 | C00086: Urea                                            |
| M00032   | Nucleotide and amino acid metabolism | Lysine metabolism                        | Lysine degradation, lysine => saccharopine => acetoacetyl-CoA                                         | hsa00310 | hsa00310                            | <a href="http://www.genome">http://www.genome</a> | C00047: L-Lysine                                                     | C00332: Acetoacetyl-CoA                                 |
| M00034_1 | Nucleotide and amino acid metabolism | Cysteine and methionine metabolism       | Methionine salvage pathway                                                                            | hsa00270 | hsa00270                            | <a href="http://www.genome">http://www.genome</a> | C00073: L-Methionine                                                 | C00147: Adenine                                         |
| M00035_1 | Nucleotide and amino acid metabolism | Cysteine and methionine metabolism       | Methionine degradation                                                                                | hsa00270 | hsa00270                            | <a href="http://www.genome">http://www.genome</a> | C00073+C00065: L-Methionine + L-Serine                               | C02291: L-Cystathionine                                 |
| M00036   | Nucleotide and amino acid metabolism | Branched-chain amino acid metabolism     | Leucine degradation, leucine => acetoacetate + acetyl-CoA                                             | hsa00280 | hsa00280                            | <a href="http://www.genome">http://www.genome</a> | C00123: L-Leucine                                                    | C00164: Acetoacetate                                    |
| M00037   | Nucleotide and amino acid metabolism | Aromatic amino acid metabolism           | Melatonin biosynthesis, tryptophan => serotonin => melatonin                                          | hsa00380 | hsa00380                            | <a href="http://www.genome">http://www.genome</a> | C00078: L-Tryptophan                                                 | C01598: Melatonin                                       |
| M00042   | Nucleotide and amino acid metabolism | Aromatic amino acid metabolism           | Catecholamine biosynthesis, tyrosine => dopamine => noradrenaline =>                                  | hsa00350 | hsa00350                            | <a href="http://www.genome">http://www.genome</a> | C00082: L-Tyrosine                                                   | C00788: L-Adrenaline                                    |
| M00043   | Nucleotide and amino acid metabolism | Aromatic amino acid metabolism           | Thyroid hormone biosynthesis, tyrosine => triiodothyronine/thyroxine                                  | hsa00350 | hsa00350                            | <a href="http://www.genome">http://www.genome</a> | C00082: L-Tyrosine                                                   | C02465: Triiodothyronine                                |
| M00044_1 | Nucleotide and amino acid metabolism | Aromatic amino acid metabolism           | Tyrosine degradation, tyrosine => homogentisate                                                       | hsa00350 | hsa00350                            | <a href="http://www.genome">http://www.genome</a> | C00082: L-Tyrosine                                                   | C00122: Fumarate                                        |
| M00046_1 | Nucleotide and amino acid metabolism | Pyrimidine metabolism                    | Pyrimidine degradation, uracil => beta-alanine, thymine => 3-aminoisobu                               | hsa00240 | hsa00240                            | <a href="http://www.genome">http://www.genome</a> | C00106: Uracil                                                       | C00099: beta-Alanine                                    |
| M00046_2 | Nucleotide and amino acid metabolism | Pyrimidine metabolism                    | Pyrimidine degradation, uracil => beta-alanine, thymine => 3-aminoisobu                               | hsa00240 | hsa00240                            | <a href="http://www.genome">http://www.genome</a> | C00178: Thymine                                                      | C05145: 3-Aminoisobutyric acid                          |
| M00047   | Nucleotide and amino acid metabolism | Other amino acid metabolism              | Creatine pathway                                                                                      | hsa00330 | hsa00330                            | <a href="http://www.genome">http://www.genome</a> | C00062: L-Arginine                                                   | C00791: Creatinine                                      |
| M00048   | Nucleotide and amino acid metabolism | Purine metabolism                        | Inosine monophosphate biosynthesis, PRPP + glutamine => IMP                                           | hsa00230 | hsa00230                            | <a href="http://www.genome">http://www.genome</a> | C00119+C00064: 5-Phospho-alpha-D-ribose 1-diphosphate + L-Glutamine  | C00130: IMP                                             |
| M00049   | Nucleotide and amino acid metabolism | Purine metabolism                        | Adenine ribonucleotide biosynthesis, IMP => ADP,ATP                                                   | hsa00230 | hsa00230                            | <a href="http://www.genome">http://www.genome</a> | C00130: IMP                                                          | C00002: ATP                                             |
| M00050   | Nucleotide and amino acid metabolism | Purine metabolism                        | Guanine ribonucleotide biosynthesis, IMP => GDP,GTP                                                   | hsa00230 | hsa00230                            | <a href="http://www.genome">http://www.genome</a> | C00130: IMP                                                          | C00044: GTP                                             |
| M00051_1 | Nucleotide and amino acid metabolism | Pyrimidine metabolism                    | Uridine monophosphate biosynthesis, glutamine (+ PRPP) => UMP                                         | hsa00240 | hsa00240                            | <a href="http://www.genome">http://www.genome</a> | C00064+C00119: L-Glutamine + 5-Phospho-alpha-D-ribose 1-diphosphate  | C00105: UMP                                             |
| M00052   | Nucleotide and amino acid metabolism | Pyrimidine metabolism                    | Pyrimidine ribonucleotide biosynthesis, UMP => UDP/UTP,CDP/CTP                                        | hsa00240 | hsa00240                            | <a href="http://www.genome">http://www.genome</a> | C00105: UMP                                                          | C00112: CDP                                             |
| M00055   | Carbohydrate and lipid metabolism    | Glycan metabolism                        | N-glycan precursor biosynthesis                                                                       | hsa00510 | hsa00510                            | <a href="http://www.genome">http://www.genome</a> | C00110: Dolichyl phosphate                                           | G00008:                                                 |
| M00056_1 | Carbohydrate and lipid metabolism    | Glycan metabolism                        | O-glycan biosynthesis, mucin type core                                                                | hsa00512 | hsa00512                            | <a href="http://www.genome">http://www.genome</a> | C02189+G10611: [Protein]-L-serine                                    | G00025:                                                 |
| M00056_2 | Carbohydrate and lipid metabolism    | Glycan metabolism                        | O-glycan biosynthesis, mucin type core                                                                | hsa00512 | hsa00512                            | <a href="http://www.genome">http://www.genome</a> | C02189+G10611: [Protein]-L-serine                                    | G00029:                                                 |
| M00056_3 | Carbohydrate and lipid metabolism    | Glycan metabolism                        | O-glycan biosynthesis, mucin type core                                                                | hsa00512 | hsa00512                            | <a href="http://www.genome">http://www.genome</a> | C02189+G10611: [Protein]-L-serine                                    | G00031:                                                 |
| M00057   | Carbohydrate and lipid metabolism    | Glycosaminoglycan metabolism             | Glycosaminoglycan biosynthesis, linkage tetrasaccharide                                               | hsa00532 | hsa00532                            | <a href="http://www.genome">http://www.genome</a> | C02189: [Protein]-L-serine                                           | G00157:                                                 |
| M00058   | Carbohydrate and lipid metabolism    | Glycosaminoglycan metabolism             | Glycosaminoglycan biosynthesis, chondroitin sulfate backbone                                          | hsa00532 | hsa00532                            | <a href="http://www.genome">http://www.genome</a> | G00157:                                                              | G00160:                                                 |
| M00059   | Carbohydrate and lipid metabolism    | Glycosaminoglycan metabolism             | Glycosaminoglycan biosynthesis, heparan sulfate backbone                                              | hsa00534 | hsa00534                            | <a href="http://www.genome">http://www.genome</a> | G00157:                                                              | G00164:                                                 |
| M00065   | Carbohydrate and lipid metabolism    | Glycan metabolism                        | GPI-anchor biosynthesis, core oligosaccharide                                                         | hsa00563 | hsa00563                            | <a href="http://www.genome">http://www.genome</a> | C01194: 1-Phosphatidyl-D-myo-inositol                                | G13044:                                                 |
| M00066   | Carbohydrate and lipid metabolism    | Lipid metabolism                         | Lactosylceramide biosynthesis                                                                         | hsa00600 | hsa00600                            | <a href="http://www.genome">http://www.genome</a> | C00195: N-Acylsphingosine                                            | C01290: beta-D-Galactosyl-(1->4)-beta-D-glucosyl-(11)-c |
| M00067_1 | Carbohydrate and lipid metabolism    | Lipid metabolism                         | Cerebroside and sulfatide biosynthesis                                                                | hsa00600 | hsa00600;hsa00565                   | <a href="http://www.genome">http://www.genome</a> | C00195: N-Acylsphingosine                                            | C06125: Sulfatide                                       |
| M00067_2 | Carbohydrate and lipid metabolism    | Lipid metabolism                         | Cerebroside and sulfatide biosynthesis                                                                | hsa00600 | hsa00600;hsa00565                   | <a href="http://www.genome">http://www.genome</a> | C03201: 1-Alkyl-2-acylglycerol                                       | C20825: Seminolipid                                     |
| M00068   | Carbohydrate and lipid metabolism    | Glycan metabolism                        | Glycosphingolipid biosynthesis, globo-series, LacCer => Gb4Cer                                        | hsa00603 | hsa00603                            | <a href="http://www.genome">http://www.genome</a> | G00092:                                                              | G00094:                                                 |
| M00069   | Carbohydrate and lipid metabolism    | Glycan metabolism                        | Glycosphingolipid biosynthesis, ganglio series, LacCer => GT3                                         | hsa00604 | hsa00604                            | <a href="http://www.genome">http://www.genome</a> | G00092:                                                              | G00118:                                                 |
| M00070   | Carbohydrate and lipid metabolism    | Glycan metabolism                        | Glycosphingolipid biosynthesis, lacto-series, LacCer => Lc4Cer                                        | hsa00601 | hsa00601                            | <a href="http://www.genome">http://www.genome</a> | G00092:                                                              | G00037:                                                 |
| M00071   | Carbohydrate and lipid metabolism    | Glycan metabolism                        | Glycosphingolipid biosynthesis, neolacto-series, LacCer => nLc4Cer                                    | hsa00601 | hsa00601                            | <a href="http://www.genome">http://www.genome</a> | G00092:                                                              | G00050:                                                 |
| M00073   | Carbohydrate and lipid metabolism    | Glycan metabolism                        | N-glycan precursor trimming                                                                           | hsa00510 | hsa00510                            | <a href="http://www.genome">http://www.genome</a> | G00009:                                                              | G00012:                                                 |
| M00075_1 | Carbohydrate and lipid metabolism    | Glycan metabolism                        | N-glycan biosynthesis, complex type                                                                   | hsa00510 | hsa00510                            | <a href="http://www.genome">http://www.genome</a> | G00013:                                                              | G00019:                                                 |
| M00075_2 | Carbohydrate and lipid metabolism    | Glycan metabolism                        | N-glycan biosynthesis, complex type                                                                   | hsa00510 | hsa00510                            | <a href="http://www.genome">http://www.genome</a> | G00013:                                                              | G00022:                                                 |
| M00075_3 | Carbohydrate and lipid metabolism    | Glycan metabolism                        | N-glycan biosynthesis, complex type                                                                   | hsa00510 | hsa00510                            | <a href="http://www.genome">http://www.genome</a> | G00013:                                                              | G00018:                                                 |
| M00076   | Carbohydrate and lipid metabolism    | Glycosaminoglycan metabolism             | Dermatan sulfate degradation                                                                          | hsa00531 | hsa00531                            | <a href="http://www.genome">http://www.genome</a> | C00426: Dermatan sulfate                                             | G00082:                                                 |
| M00077   | Carbohydrate and lipid metabolism    | Glycosaminoglycan metabolism             | Chondroitin sulfate degradation                                                                       | hsa00531 | hsa00531                            | <a href="http://www.genome">http://www.genome</a> | G12336:                                                              | G00087:                                                 |
| M00078   | Carbohydrate and lipid metabolism    | Glycosaminoglycan metabolism             | Heparan sulfate degradation                                                                           | hsa00531 | hsa00531                            | <a href="http://www.genome">http://www.genome</a> | C00925: Heparan sulfate                                              | G02632:                                                 |
| M00079   | Carbohydrate and lipid metabolism    | Glycosaminoglycan metabolism             | Keratan sulfate degradation                                                                           | hsa00531 | hsa00531                            | <a href="http://www.genome">http://www.genome</a> | C00573: Keratan sulfate                                              | G01391:                                                 |
| M00082   | Carbohydrate and lipid metabolism    | Fatty acid metabolism                    | Fatty acid biosynthesis, initiation                                                                   | hsa00061 | hsa01212;hsa00061                   | <a href="http://www.genome">http://www.genome</a> | C00024: Acetyl-CoA                                                   | C05744: Acetoacetyl-[acp]                               |
| M00083   | Carbohydrate and lipid metabolism    | Fatty acid metabolism                    | Fatty acid biosynthesis, elongation                                                                   | hsa00061 | hsa01212;hsa00061                   | <a href="http://www.genome">http://www.genome</a> | C03939: Acetyl-[acyl-carrier protein]                                | C05745: Butyryl-[acp]                                   |
| M00085   | Carbohydrate and lipid metabolism    | Fatty acid metabolism                    | Fatty acid biosynthesis, elongation, mitochondria                                                     | hsa00062 | hsa01212;hsa00062                   | <a href="http://www.genome">http://www.genome</a> | C00024: Acetyl-CoA                                                   | C00040: Acyl-CoA                                        |
| M00087   | Carbohydrate and lipid metabolism    | Fatty acid metabolism                    | beta-Oxidation                                                                                        | hsa00071 | hsa01212;hsa00071                   | <a href="http://www.genome">http://www.genome</a> | C00154: Palmitoyl-CoA                                                | C02593: Tetradecanoyl-CoA                               |
| M00089   | Carbohydrate and lipid metabolism    | Fatty acid metabolism                    | Triacylglycerol biosynthesis                                                                          | hsa00561 | hsa00561                            | <a href="http://www.genome">http://www.genome</a> | C00093: sn-Glycerol 3-phosphate                                      | C00422: Triacylglycerol                                 |
| M00090   | Carbohydrate and lipid metabolism    | Fatty acid metabolism                    | Phosphatidylcholine (PC) biosynthesis, choline => PC                                                  | hsa00564 | hsa00564                            | <a href="http://www.genome">http://www.genome</a> | C00114: Choline                                                      | C00157: Phosphatidylcholine                             |
| M00091   | Carbohydrate and lipid metabolism    | Fatty acid metabolism                    | Phosphatidylcholine (PC) biosynthesis, PE => PC                                                       | hsa00564 | hsa00564                            | <a href="http://www.genome">http://www.genome</a> | C00350: Phosphatidylethanolamine                                     | C00157: Phosphatidylcholine                             |
| M00092   | Carbohydrate and lipid metabolism    | Fatty acid metabolism                    | Phosphatidylethanolamine (PE) biosynthesis, ethanolamine => PE                                        | hsa00564 | hsa00564                            | <a href="http://www.genome">http://www.genome</a> | C00189: Ethanolamine                                                 | C00350: Phosphatidylethanolamine                        |
| M00094_1 | Carbohydrate and lipid metabolism    | Lipid metabolism                         | Ceramide biosynthesis                                                                                 | hsa00600 | hsa00600                            | <a href="http://www.genome">http://www.genome</a> | C00154+C00065: Palmitoyl-CoA + L-Serine                              | C00195: N-Acylsphingosine                               |
| M00095   | Carbohydrate and lipid metabolism    | Terpenoid backbone biosynthesis          | C5 isoprenoid biosynthesis, mevalonate pathway                                                        | hsa00900 | hsa00900                            | <a href="http://www.genome">http://www.genome</a> | C00024: Acetyl-CoA                                                   | C00235: Dimethylallyl diphosphate                       |
| M00098   | Carbohydrate and lipid metabolism    | Lipid metabolism                         | Acylglycerol degradation                                                                              | hsa00561 | hsa00561                            | <a href="http://www.genome">http://www.genome</a> | C00422: Triacylglycerol                                              | C00116: Glycerol                                        |
| M00099   | Carbohydrate and lipid metabolism    | Lipid metabolism                         | Sphingosine biosynthesis                                                                              | hsa00600 | hsa00600                            | <a href="http://www.genome">http://www.genome</a> | C00154: Palmitoyl-CoA                                                | C00319: Sphingosine                                     |
| M00100   | Carbohydrate and lipid metabolism    | Lipid metabolism                         | Sphingosine degradation                                                                               | hsa00600 | hsa00600                            | <a href="http://www.genome">http://www.genome</a> | C00319: Sphingosine                                                  | C00346: Ethanolamine phosphate                          |
| M00101   | Carbohydrate and lipid metabolism    | Sterol biosynthesis                      | Cholesterol biosynthesis, squalene 2,3-epoxide => cholesterol                                         | hsa00100 | hsa00100                            | <a href="http://www.genome">http://www.genome</a> | C01054: (S)-2,3-Epoxy-squalene                                       | C00187: Cholesterol                                     |
| M00103   | Carbohydrate and lipid metabolism    | Sterol biosynthesis                      | Cholecalciferol biosynthesis                                                                          | hsa00100 | hsa00100                            | <a href="http://www.genome">http://www.genome</a> | C01164: 7-Dehydrocholesterol                                         | C01673: Calcitriol                                      |
| M00104_1 | Carbohydrate and lipid metabolism    | Sterol biosynthesis                      | Bile acid biosynthesis, cholesterol => cholate                                                        | hsa00120 | hsa00120                            | <a href="http://www.genome">http://www.genome</a> | C00187: Cholesterol                                                  | C00695: Cholic acid                                     |
| M00104_2 | Carbohydrate and lipid metabolism    | Sterol biosynthesis                      | Bile acid biosynthesis, cholesterol => cholate                                                        | hsa00120 | hsa00120                            | <a href="http://www.genome">http://www.genome</a> | C00187: Cholesterol                                                  | C02528: Chenodeoxycholate                               |
| M00106_1 | Carbohydrate and lipid metabolism    | Sterol biosynthesis                      | Conjugated bile acid biosynthesis, cholate => taurocholate/glycocholate                               | hsa00120 | hsa00120                            | <a href="http://www.genome">http://www.genome</a> | C00695: Cholic acid                                                  | C05122: Taurocholate                                    |
| M00106_2 | Carbohydrate and lipid metabolism    | Sterol biosynthesis                      | Conjugated bile acid biosynthesis, cholate => taurocholate/glycocholate                               | hsa00120 | hsa00120                            | <a href="http://www.genome">http://www.genome</a> | C00695: Cholic acid                                                  | C01921: Glycocholate                                    |
| M00107   | Carbohydrate and lipid metabolism    | Sterol biosynthesis                      | Steroid hormone biosynthesis, cholesterol => progesterone => progesterone                             | hsa00140 | hsa00140                            | <a href="http://www.genome">http://www.genome</a> | C00187: Cholesterol                                                  | C00410: Progesterone                                    |
| M00108   | Carbohydrate and lipid metabolism    | Sterol biosynthesis                      | C21-Steroid hormone biosynthesis, progesterone => corticosterone/aldox                                | hsa00140 | hsa00140                            | <a href="http://www.genome">http://www.genome</a> | C00410: Progesterone                                                 | C01780: Aldosterone                                     |
| M00109   | Carbohydrate and lipid metabolism    | Sterol biosynthesis                      | C21-Steroid hormone biosynthesis, progesterone => cortisol/cortisone                                  | hsa00140 | hsa00140                            | <a href="http://www.genome">http://www.genome</a> | C00410: Progesterone                                                 | C00762: Cortisone                                       |
| M00110   | Carbohydrate and lipid metabolism    | Sterol biosynthesis                      | C19/C18-Steroid hormone biosynthesis, pregnenolone => androstenedio                                   | hsa00140 | hsa00140                            | <a href="http://www.genome">http://www.genome</a> | C01953: Pregnenolone                                                 | C00468: Estrone                                         |
| M00118   | Nucleotide and amino acid metabolism | Cofactor and vitamin biosynthesis        | Glutathione biosynthesis, glutamate => glutathione                                                    | hsa00480 | hsa00480                            | <a href="http://www.genome">http://www.genome</a> | C00025: L-Glutamate                                                  | C00051: Glutathione                                     |
| M00120   | Nucleotide and amino acid metabolism | Cofactor and vitamin biosynthesis        | Cofactor and vitamin biosynthesis                                                                     | hsa00770 | hsa00770                            | <a href="http://www.genome">http://www.genome</a> | C00864: Pantothenate                                                 | C00010: CoA                                             |
| M00128   | Nucleotide and amino acid metabolism | Cofactor and vitamin biosynthesis        | Ubiquinone biosynthesis, eukaryotes, 4-hydroxybenzoate => ubiquinone                                  | hsa00130 | hsa00130                            | <a href="http://www.genome">http://www.genome</a> | C00156: 4-Hydroxybenzoate                                            | C00399: Ubiquinone                                      |
| M00130   | Carbohydrate and lipid metabolism    | Lipid metabolism                         | Inositol phosphate metabolism, PI=>PIP2 => Ins(1,4,5)P3 => Ins(1,3,4,5)P4 => Ins(1,3,4,5)P4 => myo-in | hsa00562 | hsa00562                            | <a href="http://www.genome">http://www.genome</a> | C01194: 1-Phosphatidyl-D-myo-inositol                                | C01272: 1D-myo-Inositol 1,3,4,5-tetrakisphosphate       |
| M00131   | Carbohydrate and lipid metabolism    | Lipid metabolism                         | Inositol phosphate metabolism, Ins(1,3,4,5)P4 => Ins(1,3,4)P3 => myo-in                               | hsa00562 | hsa00562                            | <a href="http://www.genome">http://www.genome</a> | C01272: 1D-myo-Inositol 1,3,4,5-tetrakisphosphate                    | C00137: myo-Inositol                                    |
| M00132   | Carbohydrate and lipid metabolism    | Lipid metabolism                         | Inositol phosphate metabolism, Ins(1,3,4)P3 => phytate                                                | hsa00562 | hsa00562                            | <a href="http://www.genome">http://www.genome</a> | C01243: 1D-myo-Inositol 1,3,4-trisphosphate                          | C01204: Phytic acid                                     |
| M0       |                                      |                                          |                                                                                                       |          |                                     |                                                   |                                                                      |                                                         |

|          |                                      |                                    |                                                                        |          |                                     |                                                                                            |                                    |
|----------|--------------------------------------|------------------------------------|------------------------------------------------------------------------|----------|-------------------------------------|--------------------------------------------------------------------------------------------|------------------------------------|
| M00135   | Nucleotide and amino acid metabolism | Polyamine biosynthesis             | GABA biosynthesis, eukaryotes, putrescine => GABA                      | hsa00330 | hsa00330                            | <a href="http://www.genome">http://www.genome</a> C00134: Putrescine                       | C00334: 4-Aminobutanoate           |
| M00141   | Nucleotide and amino acid metabolism | Cofactor and vitamin biosynthesis  | C1-unit interconversion, eukaryotes                                    | hsa00670 | hsa00670                            | <a href="http://www.genome">http://www.genome</a> C00101: Tetrahydrofolate                 | C00101: Tetrahydrofolate           |
| M00338_1 | Nucleotide and amino acid metabolism | Cysteine and methionine metabolism | Cysteine biosynthesis, homocysteine + serine => cysteine               | hsa00270 | hsa01230;hsa00270                   | <a href="http://www.genome">http://www.genome</a> C00065+C00155: L-Serine + L-Homocysteine | C00097: L-Cysteine                 |
| M00367   | Nucleotide and amino acid metabolism | Terpenoid backbone biosynthesis    | C10-C20 isoprenoid biosynthesis, non-plant eukaryotes                  | hsa00900 | hsa00900                            | <a href="http://www.genome">http://www.genome</a> C00129: Isopentenyl diphosphate          | C00353: Geranylgeranyl diphosphate |
| M00415   | Nucleotide and amino acid metabolism | Fatty acid metabolism              | Fatty acid biosynthesis, elongation, endoplasmic reticulum             | hsa00062 | hsa01212;hsa00062                   | <a href="http://www.genome">http://www.genome</a> C00083: Malonyl-CoA                      | C20876: Very-long-chain acyl-CoA   |
| M00549   | Carbohydrate and lipid metabolism    | Other carbohydrate metabolism      | Nucleotide sugar biosynthesis, glucose => UDP-glucose                  | hsa00520 | hsa00520                            | <a href="http://www.genome">http://www.genome</a> C00267: alpha-D-Glucose                  | C00029: UDP-glucose                |
| M00554   | Carbohydrate and lipid metabolism    | Other carbohydrate metabolism      | Nucleotide sugar biosynthesis, galactose => UDP-galactose              | hsa00520 | hsa00520;hsa00052                   | <a href="http://www.genome">http://www.genome</a> C00124: D-Galactose                      | C00052: UDP-alpha-D-galactose      |
| M00632_1 | Carbohydrate and lipid metabolism    | Other carbohydrate metabolism      | Galactose degradation, Leloir pathway, galactose => alpha-D-glucose-1F | hsa00052 | hsa00052                            | <a href="http://www.genome">http://www.genome</a> C00124: D-Galactose                      | C00103: D-Glucose 1-phosphate      |
| M00741   | Carbohydrate and lipid metabolism    | Other carbohydrate metabolism      | Propanoyl-CoA metabolism, propanoyl-CoA => succinyl-CoA                | hsa00280 | hsa01200;hsa00280;hsa00630;hsa00640 | <a href="http://www.genome">http://www.genome</a> C00100: Propanoyl-CoA                    | C00091: Succinyl-CoA               |

\*[http://www.genome.jp/kegg-bin/get\\_htext](http://www.genome.jp/kegg-bin/get_htext)

eramide



|                                                           |                 |                  |                    |                                  |
|-----------------------------------------------------------|-----------------|------------------|--------------------|----------------------------------|
| Aldosterone (M00108_C01780)                               | Down (3.17e-12) | Down (1.16e-14)  | Up (4.04e-07)      |                                  |
| Cortisone (M00109_C00762)                                 |                 | Down (0.00497)   | Down (1.16e-12)    |                                  |
| Estrone (M00110_C00468)                                   | Down (0.00994)  | Up (3.63e-06)    | Up (0.0152)        | Down (0.00749) Down (0.0128)     |
| Glutathione (M00118_C00051)                               |                 | Down (0.00139)   |                    | Down (0.0186)                    |
| CoA (M00120_C00010)                                       | Up (9.74e-31)   |                  |                    | Up (6.62e-07)                    |
| Ubiquinone (M00128_C00399)                                | Up (1.31e-09)   | Down (1.33e-10)  | Down (1.74e-16)    | Up (1.77e-07)                    |
| 1D-myo-Inositol 1,3,4,5-tetrakisphosphate (M00130_C01272) |                 | Up (1.39e-14)    | Down (3.99e-25)    | Down (4.35e-05) Unknown (0.0233) |
| myo-Inositol (M00131_C00137)                              | Down (5.43e-42) | Down (0.0223)    | Down (3.5e-10)     | Down (5.97e-12) Unknown (0.0233) |
| Phytic acid (M00132_C01204)                               | Up (0.000437)   | Down (0.000525)  | Up (2.21e-12)      |                                  |
| Spermidine (M00133_C00315)                                |                 | Up (0.0315)      | Up (7.28e-19)      | Up (2.94e-13)                    |
| Putrescine (M00134_C00134)                                | Down (9.62e-16) | Down (0.000205)  | Down (8.28e-29)    |                                  |
| 4-Aminobutanoate (M00135_C00334)                          | Down (3.91e-42) | Down (3.35e-16)  | Down (2.27e-07)    | Down (0.0138)                    |
| C1-unit interconversion (M00141)                          | Up (0.0167)     | Down (2.63e-17)  | Down (0.00222)     | Up (3.03e-14)                    |
| L-Cysteine (M00338_C00097)                                | Up (2.11e-09)   | Down (7.38e-16)  | Down (3.48e-29)    | Up (9.44e-11)                    |
| Geranylgeranyl diphosphate (M00367_C00353)                | Up (1.22e-40)   | Up (2.88e-11)    | Down (1.18e-10)    | Up (0.000693)                    |
| Very-long-chain acyl-CoA (M00415_C20876)                  | Up (1.27e-61)   | Up (1.49e-26)    | Up (1.06e-40)      | Up (1.62e-28)                    |
| UDP-glucose (M00549_C00029)                               | Down (7.92e-31) | Down (1.23e-05)  | Up (6.14e-14)      | Down (9.92e-08)                  |
| UDP-alpha-D-galactose (M00554_C00052)                     |                 |                  | Down (0.00149)     |                                  |
| D-Glucose 1-phosphate (M00632_C00103)                     |                 | Down (0.000985)  | Down (6.04e-10)    |                                  |
| Succinyl-CoA (M00741_C00091)                              | Up (0.0346)     | Down (2.14e-20)  | Down (1.21e-33)    | Up (0.000249)                    |
|                                                           |                 | Unknown (0.0228) | Unknown (3.66e-05) | Unknown (1.26e-05)               |

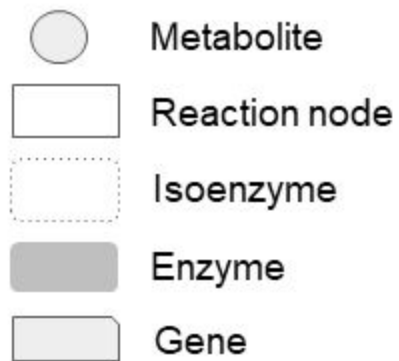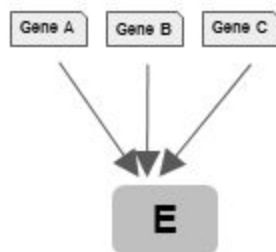

**1**

Enzymes can be formed by one or several genes

90<sup>th</sup> percentile of normalized gene expression of gene A,B,C

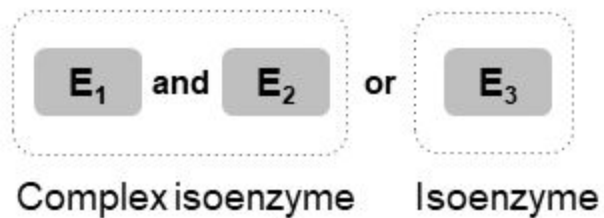

**2**

Reaction node with two alternative isoenzymes  
 if "and" minimum value of activities  
 if "or" maximum value of activities  
 Reaction node activity =  $\max\{\min\{E1,E2\},E3\}$

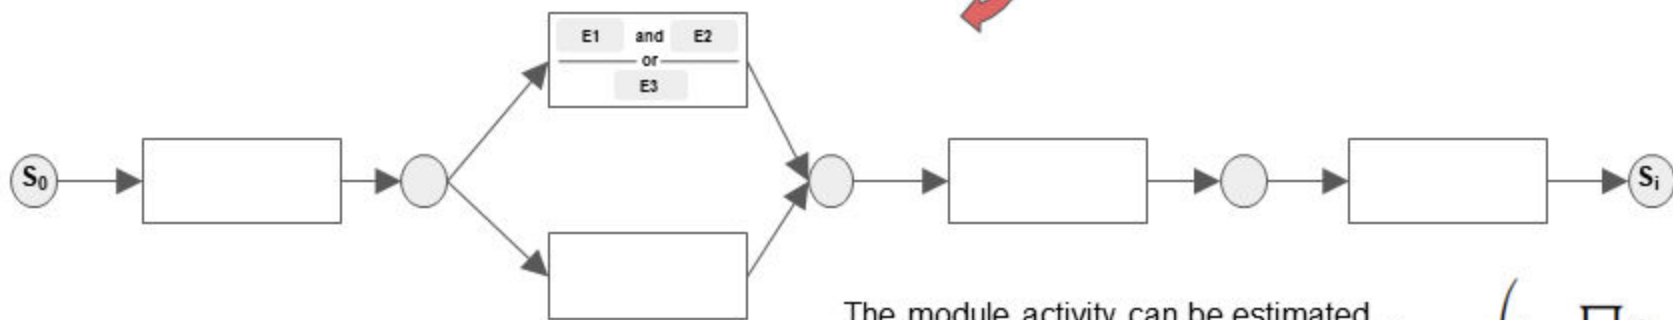

**3**

The module activity can be estimated from the reaction node activities using the equation:

$$S_i = n_i \cdot \left( 1 - \prod_{s_a \in A_i} (1 - s_a) \right)$$

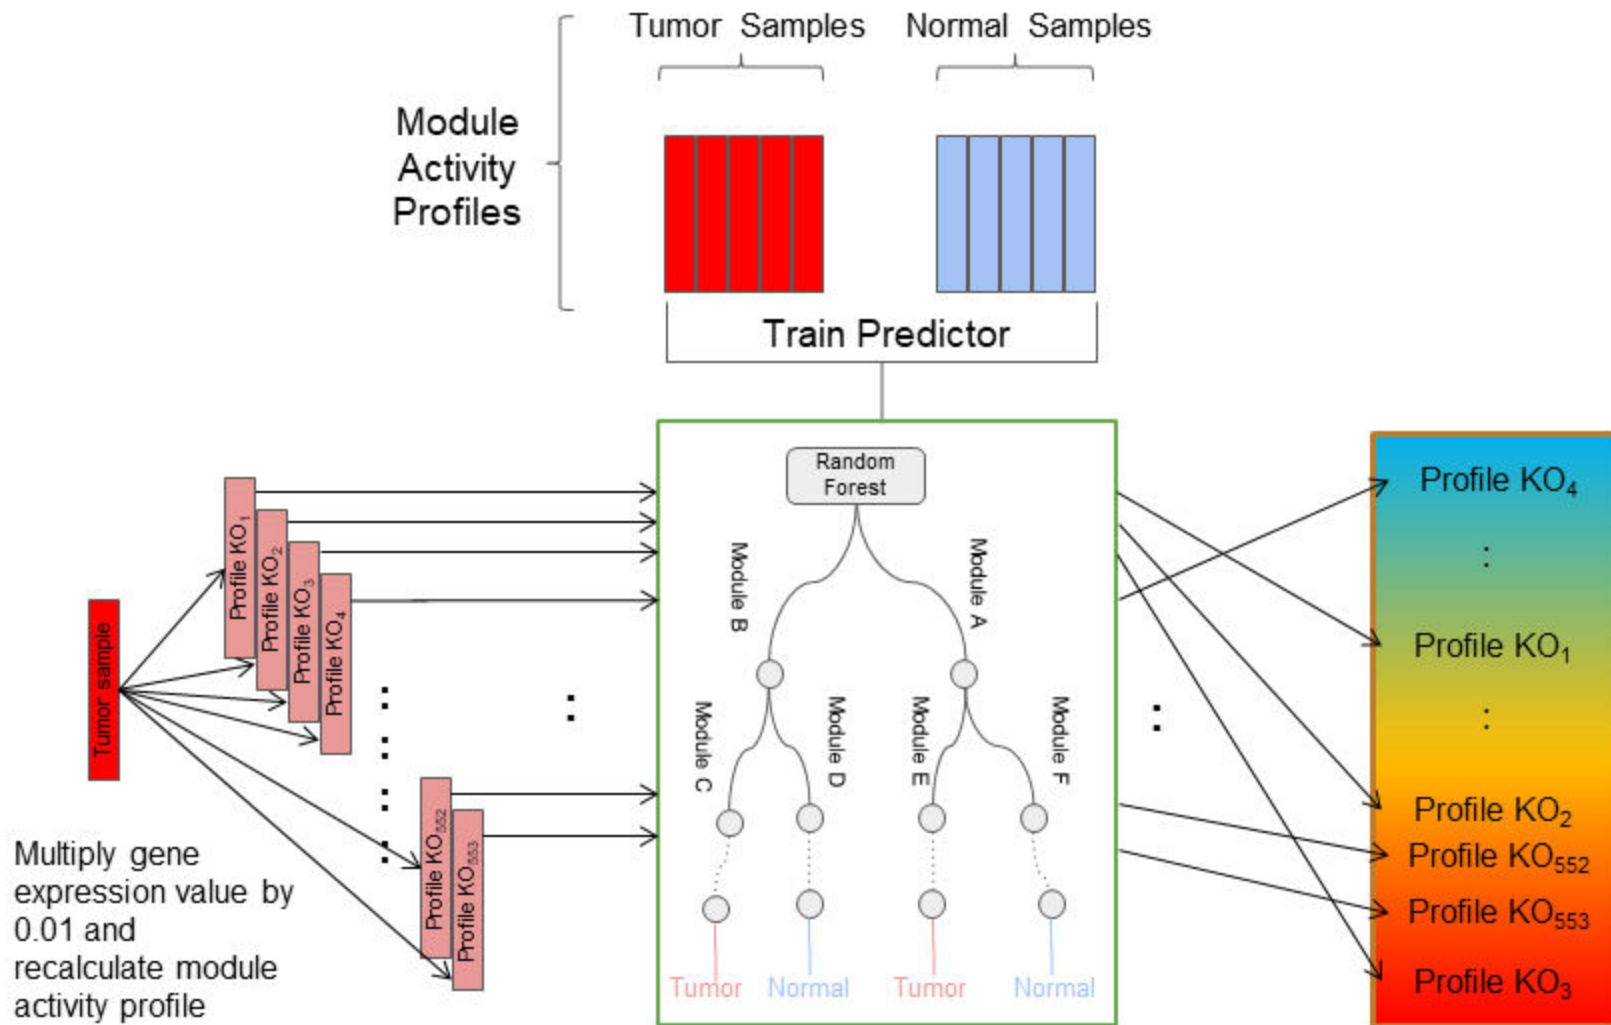

Supplement: 41540_2019_87_MOESM1_ESM.pdf [file 41540_2019_87_MOESM1_ESM.pdf]
